# Supplementary material
Source: PubMed Central journal article supplement (PMC5508369)
Supplement: CEI-189-226-s001.pdf [file CEI-189-226-s001.pdf]

**Supplementary Table 1.** Allelic frequencies of C5 c.754G>A / p.A252T mutation.

| Continental Region | Country                                 | Alleles tested | Mut allele | Mut Allelic frequency (%) |
|--------------------|-----------------------------------------|----------------|------------|---------------------------|
| SSAFR              | South-Africa                            | 16             | 1          | 6.25                      |
| SSAFR              | Kenya                                   | 24             | 0          | 0                         |
| SSAFR              | Namibia                                 | 14             | 0          | 0                         |
| SSAFR              | Central African Rep.                    | 72             | 0          | 0                         |
| SSAFR              | Nigeria                                 | 50             | 1          | 2                         |
| SSAFR              | Democratic Rep. Congo                   | 30             | 0          | 0                         |
| SSAFR              | Gabon                                   | 704            | 7          | 1                         |
| AME                | Senegal                                 | 48             | 0          | 0                         |
| AME                | Brazil                                  | 90             | 0          | 0                         |
| AME                | Mexico                                  | 100            | 0          | 0                         |
| AME                | Colombia                                | 26             | 0          | 0                         |
| EASIA              | China                                   | 368            | 0          | 0                         |
| EASIA              | Japan                                   | 62             | 0          | 0                         |
| EASIA              | Cambodia                                | 22             | 0          | 0                         |
| EASIA              | Siberia                                 | 50             | 0          | 0                         |
| CSASIA             | Pakistan                                | 400            | 1          | 0.25                      |
| MENA               | Algeria                                 | 252            | 0          | 0                         |
| MENA               | Israel (Carmel)                         | 96             | 0          | 0                         |
| MENA               | Israel (Central)                        | 102            | 0          | 0                         |
| MENA               | Israel (Negev)                          | 98             | 1          | 1.03                      |
| MENA               | Morocco                                 | 508            | 0          | 0                         |
| MENA               | Tunisia                                 | 494            | 0          | 0                         |
| MENA               | Libya                                   | 342            | 0          | 0                         |
| OCE                | Bougainville                            | 44             | 0          | 0                         |
| OCE                | New Guinea                              | 34             | 0          | 0                         |
| EUR                | France                                  | 106            | 0          | 0                         |
| EUR                | Italy                                   | 72             | 0          | 0                         |
| EUR                | Italy (Bergamo)                         | 28             | 0          | 0                         |
| EUR                | Orkney Islands                          | 32             | 0          | 0                         |
| EUR                | Russia                                  | 50             | 0          | 0                         |
| EUR                | Russia Caucasus                         | 34             | 0          | 0                         |
| EUR                | Local population (Barcelona, Catalonia) | 1052           | 0          | 0                         |
|                    | <b>TOTAL</b>                            | <b>5420</b>    | <b>11</b>  | 0.21                      |

SSAFR: South-Saharan Africa; AME: America; EASIA: East Asia; CSASIA: Central and South Asia; MENA: Middle-East and North Africa; OCE: Oceania; EUR: Europe.

C5 gene (chr 9q33-q34). 41 exons.

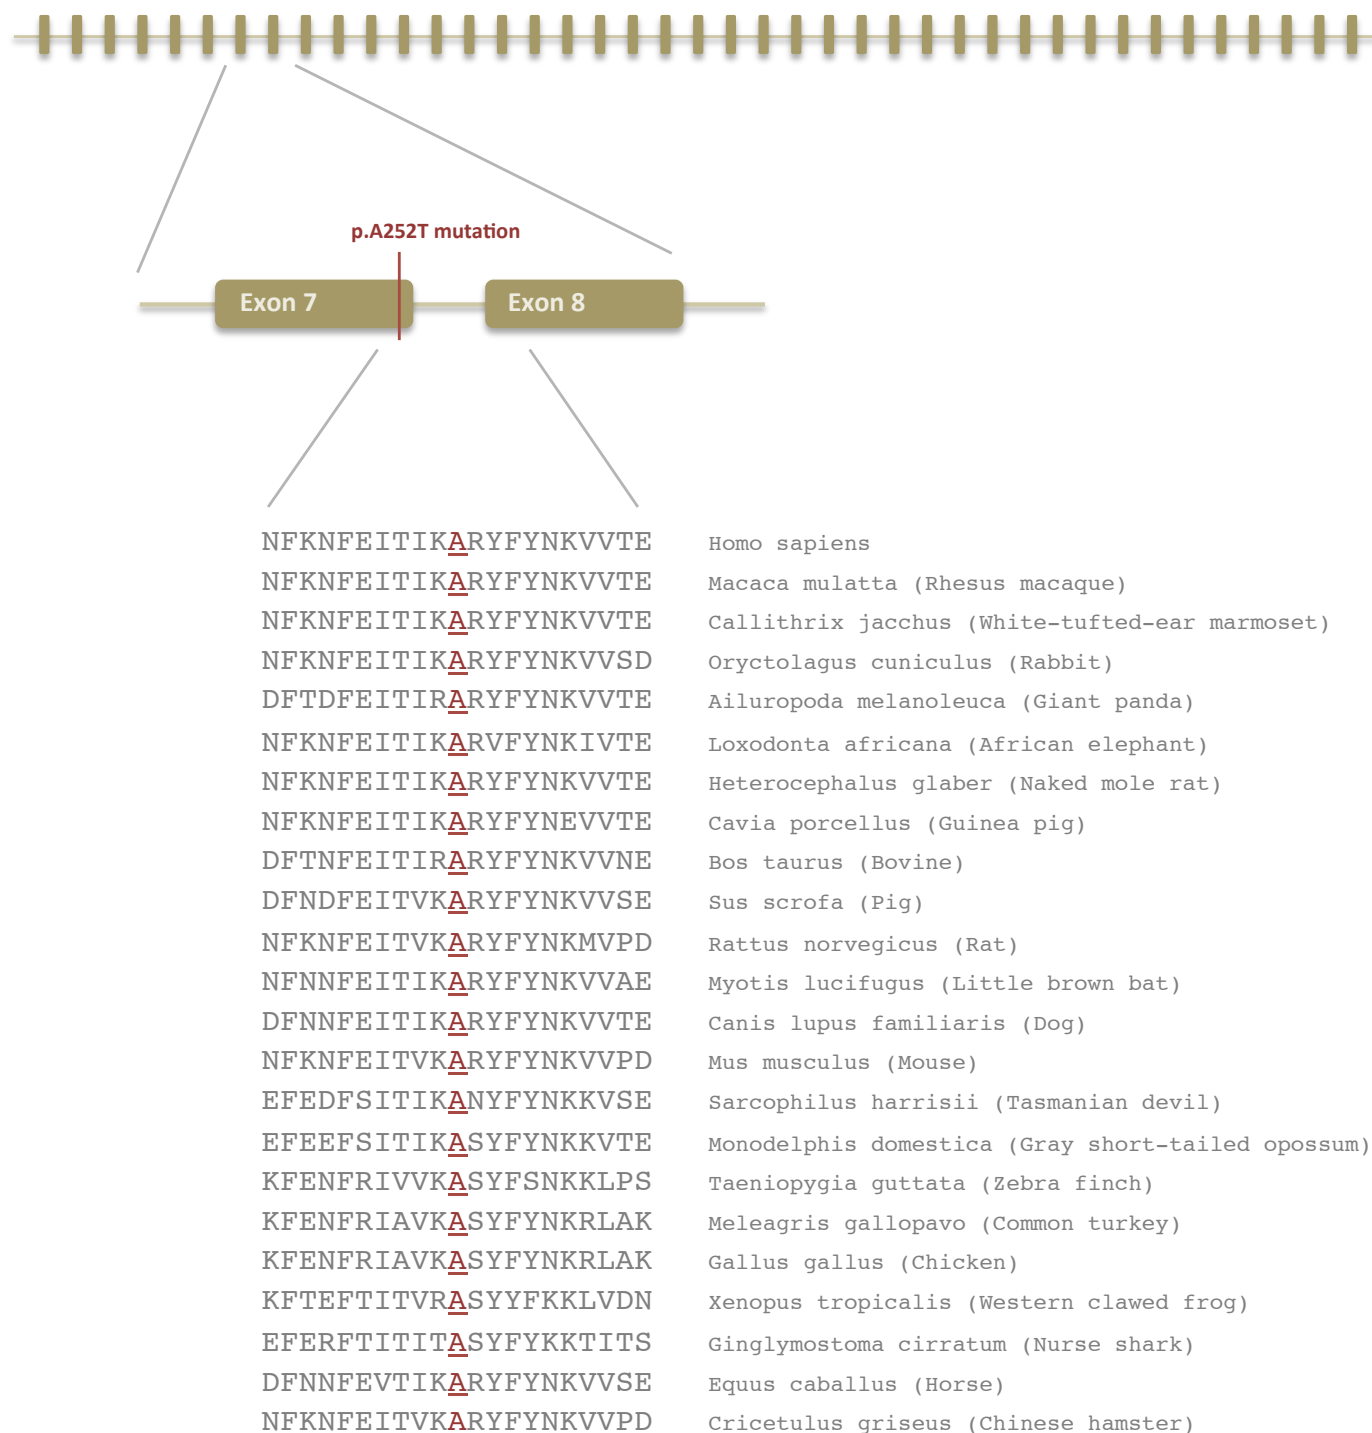

**Supplementary Figure 1. Phylogenetic comparison of human C5 protein sequence.**

C5 multiple sequence alignment focusing on A252 is shown. Amino acid sequences from different organisms have been obtained from UniProt database (<http://www.uniprot.org>).
